# Supplementary material for: Leveraging Artificial Intelligence to Improve Chronic Disease Care: Methods and Application to Pharmacotherapy Decision Support for Type-2 Diabetes Mellitus
Source: PubMed Central journal article supplement — Methods Inf Med. 2021 May 11;60(Suppl 1):e32–43. doi: 10.1055/s-0041-1728757 (PMC8294941; doi:10.1055/s-0041-1728757), 2021-05-11
Supplement: 10-1055-s-0041-1728757-s20010153.pdf [file 10-1055-s-0041-1728757-s20010153.pdf]

**Supplementary Table S1** Hyperparameters

| Model | Hyperparameters                                                                                                         | Range                                                    |
|-------|-------------------------------------------------------------------------------------------------------------------------|----------------------------------------------------------|
| RF    | Number of estimator<br>Maximum depth of tree<br>Minimum samples of leaf                                                 | 100–300<br>3–7, none<br>1–10                             |
| GBT   | Number of estimator<br>Maximum depth of tree<br>Minimum samples of leaf<br>Subsamples                                   | 100–300<br>3–7, None<br>1–10<br>0.8–1.0                  |
| TPGE  | SVR: Kernel coefficient<br>SVR: Regularization coefficient<br>LR: Regularization type<br>LR: Regularization coefficient | 0.001–1<br>0.01–100<br>L1 norm, L2 norm<br>0.00001–1,000 |

Abbreviations: GBT, Gradient Boosting Tree; LR, logistic regression; SVR, support vector regression; RF, Random Forest; TPGE, Treatment Pathway Graph-based Estimation.

**Supplementary Table S2** Treatment transitions extracted for 3-mo predictions

| No. | Originally prescribed drug | Newly prescribed drug | Valid range of HbA1c |      | Number of total records |
|-----|----------------------------|-----------------------|----------------------|------|-------------------------|
|     |                            |                       | Min                  | Max  |                         |
| 1   | No medication              | No medication         | 5.5                  | 17.4 | 9,255                   |
| 2   | No medication              | MET                   | 5.5                  | 16.0 | 863                     |
| 3   | No medication              | MET + SUL             | 6.4                  | 14.0 | 56                      |
| 4   | No medication              | MET + INS             | 9.7                  | 16.1 | 36                      |
| 5   | No medication              | SUL                   | 6.1                  | 9.0  | 28                      |
| 6   | MET                        | MET                   | 5.5                  | 16.0 | 6,043                   |
| 7   | MET                        | MET + SUL             | 5.5                  | 15.1 | 599                     |
| 8   | MET                        | MET + INS             | 5.7                  | 16.0 | 149                     |
| 9   | MET                        | MET + DPP-4           | 5.6                  | 11.0 | 94                      |
| 10  | MET                        | No medication         | 5.5                  | 8.3  | 54                      |
| 11  | MET                        | MET + GLP-1           | 5.8                  | 12.0 | 52                      |
| 12  | MET                        | MET + SGLT2           | 6.4                  | 9.0  | 31                      |
| 13  | MET                        | SUL                   | 5.7                  | 8.6  | 34                      |
| 14  | MET                        | MET + TZD             | 6.6                  | 9.0  | 20                      |
| 15  | MET + SUL                  | MET + SUL             | 5.5                  | 16.0 | 3,719                   |
| 16  | MET + SUL                  | MET + SUL + DPP-4     | 6.2                  | 12.5 | 143                     |
| 17  | MET + SUL                  | MET + SUL + INS       | 6.3                  | 14.7 | 121                     |
| 18  | MET + SUL                  | MET + SUL + TZD       | 6.3                  | 12.3 | 67                      |
| 19  | MET + SUL                  | MET                   | 5.5                  | 8.7  | 62                      |
| 20  | MET + SUL                  | MET + SUL + GLP-1     | 6.5                  | 11.7 | 45                      |
| 21  | MET + SUL                  | MET + SUL + SGLT2     | 6.7                  | 11.0 | 36                      |
| 22  | MET + SUL                  | MET + INS             | 8.1                  | 14.0 | 30                      |
| 23  | MET + SUL                  | SUL                   | 5.9                  | 8.1  | 17                      |
| 24  | MET + INS                  | MET + INS             | 5.5                  | 16.0 | 1,932                   |
| 25  | MET + INS                  | MET + INS + GLP-1     | 6.3                  | 12.9 | 57                      |
| 26  | MET + INS                  | MET + INS + SUL       | 6.4                  | 11.9 | 44                      |
| 27  | SUL                        | SUL                   | 5.5                  | 13.0 | 1,263                   |

(Continued)

Supplementary Table S2 (Continued)

| No. | Originally prescribed drug | Newly prescribed drug     | Valid range of HbA1c |      | Number of total records |
|-----|----------------------------|---------------------------|----------------------|------|-------------------------|
|     |                            |                           | Min                  | Max  |                         |
| 28  | SUL                        | SUL + MET                 | 5.6                  | 12.0 | 132                     |
| 29  | SUL                        | SUL + INS                 | 8.4                  | 12.4 | 23                      |
| 30  | SUL                        | SUL + DPP-4               | 6.9                  | 9.0  | 17                      |
| 31  | SUL                        | No medication             | 5.6                  | 8.0  | 23                      |
| 32  | INS                        | INS                       | 5.5                  | 14.9 | 717                     |
| 33  | INS                        | INS + MET                 | 5.9                  | 11.3 | 55                      |
| 34  | MET + SUL + INS            | MET + SUL + INS           | 5.5                  | 16.0 | 749                     |
| 35  | MET + SUL + INS            | MET + INS                 | 6.5                  | 11.3 | 28                      |
| 36  | MET + SUL + DPP-4          | MET + SUL + DPP-4         | 5.5                  | 12.9 | 537                     |
| 37  | MET + SUL + DPP-4          | MET + SUL                 | 6.2                  | 8.7  | 22                      |
| 38  | MET + SUL + DPP-4          | MET + SUL + DPP-4 + SGLT2 | 7.1                  | 9.1  | 10                      |
| 39  | MET + SUL + TZD            | MET + SUL + TZD           | 5.5                  | 12.8 | 419                     |
| 40  | MET + DPP-4                | MET + DPP-4               | 5.5                  | 12.5 | 332                     |
| 41  | MET + DPP-4                | MET + DPP-4 + SUL         | 6.6                  | 9.6  | 39                      |
| 42  | SUL + INS                  | SUL + INS                 | 5.5                  | 14.0 | 233                     |
| 43  | MET + DPP-4 + INS          | MET + DPP-4 + INS         | 5.5                  | 12.7 | 203                     |
| 44  | MET + TZD                  | MET + TZD                 | 5.5                  | 11.0 | 180                     |
| 45  | MET + TZD                  | MET + TZD + SUL           | 7.0                  | 9.0  | 12                      |
| 46  | MET + INS + GLP1           | MET + INS + GLP1          | 5.5                  | 12.5 | 185                     |
| 47  | MET + SUL + GLP1           | MET + SUL + GLP1          | 5.5                  | 9.9  | 149                     |
| 48  | MET + GLP1                 | MET + GLP1                | 5.5                  | 9.3  | 145                     |
| 49  | TZD                        | TZD                       | 5.5                  | 11.7 | 104                     |
| 50  | SUL + TZD                  | SUL + TZD                 | 5.5                  | 11.0 | 119                     |
| 51  | SUL + DPP-4                | SUL + DPP-4               | 5.5                  | 9.8  | 95                      |
| 52  | MET + SUL + SGLT2          | MET + SUL + SGLT2         | 5.6                  | 9.2  | 74                      |
| 53  | DPP-4                      | DPP-4                     | 5.5                  | 8.4  | 60                      |
| 54  | MET + SGLT2                | MET + SGLT2               | 5.8                  | 8.7  | 44                      |
| 55  | MET + TZD + INS            | MET + TZD + INS           | 5.7                  | 8.6  | 45                      |
| 56  | DPP-4 + INS + MET + SUL    | DPP-4 + INS + MET + SUL   | 6.1                  | 9.3  | 43                      |
| 57  | INS + MET + SGLT2          | INS + MET + SGLT2         | 5.8                  | 8.7  | 44                      |
| 58  | GLP-1 + INS                | GLP-1 + INS               | 5.8                  | 8.6  | 32                      |
| 59  | DPP-4 + MET + SUL + TZD    | DPP-4 + MET + SUL + TZD   | 6.2                  | 9.1  | 37                      |
| 60  | INS + MET + SUL + TZD      | INS + MET + SUL + TZD     | 6.2                  | 11.4 | 36                      |
| 61  | GLP-1                      | GLP-1                     | 5.5                  | 7.8  | 24                      |
| 62  | GLP-1 + SUL                | GLP-1 + SUL               | 5.9                  | 9.2  | 31                      |
| 63  | GLP-1 + INS + +MET + SUL   | GLP-1 + INS + +MET + SUL  | 6.0                  | 8.6  | 27                      |
| 64  | DPP-4 + INS                | DPP-4 + INS               | 6.4                  | 9.0  | 28                      |
| 65  | GLP-1 + INS + MET + SGLT2  | GLP-1 + INS + MET + SGLT2 | 5.8                  | 9.0  | 35                      |
| 66  | INS + MET + SGLT2 + SUL    | INS + MET + SGLT2 + SUL   | 6.1                  | 8.6  | 20                      |
| 67  | INS + TZD                  | INS + TZD                 | 7.1                  | 9.5  | 15                      |

Abbreviations: DPP-4, dipeptidyl peptidase-4; GLP-1, glucagon-like peptide-1; INS, insulin; MET, metformin; SGLT2, sodium-glucose co-transporter-2; SUL, sulfonylurea; TZD, thiazolidinediones.

**Supplementary Table S3** Treatment transitions extracted for 6-mo predictions

| No. | Originally prescribed drug | Newly prescribed drug | Valid range of HbA1c |      | Number of total records |
|-----|----------------------------|-----------------------|----------------------|------|-------------------------|
|     |                            |                       | Min                  | Max  |                         |
| 1   | No medication              | No medication         | 5.5                  | 17.5 | 9,557                   |
| 2   | No medication              | MET                   | 5.5                  | 14.8 | 721                     |
| 3   | No medication              | MET + SUL             | 8.8                  | 13.5 | 28                      |
| 4   | No medication              | SUL                   | 6.0                  | 8.7  | 29                      |
| 5   | No medication              | INS + MET             | 9.9                  | 14.3 | 10                      |
| 6   | MET                        | MET                   | 5.5                  | 16.0 | 7,535                   |
| 7   | MET                        | MET + SUL             | 5.5                  | 14.2 | 424                     |
| 8   | MET                        | MET + INS             | 6.6                  | 15.1 | 87                      |
| 9   | MET                        | MET + DPP-4           | 5.8                  | 11.0 | 82                      |
| 10  | MET                        | No medication         | 5.5                  | 8.6  | 69                      |
| 11  | MET                        | MET + GLP-1           | 5.6                  | 9.5  | 30                      |
| 12  | MET                        | SUL                   | 5.6                  | 8.2  | 31                      |
| 13  | MET                        | MET + SGLT2           | 6.7                  | 8.7  | 12                      |
| 14  | MET + SUL                  | MET + SUL             | 5.5                  | 15.4 | 3,573                   |
| 15  | MET + SUL                  | MET + SUL + DPP-4     | 6.3                  | 12.4 | 98                      |
| 16  | MET + SUL                  | MET + SUL + INS       | 6.1                  | 15.1 | 85                      |
| 17  | MET + SUL                  | MET                   | 5.5                  | 8.9  | 67                      |
| 18  | MET + SUL                  | MET + SUL + TZD       | 6.3                  | 11.5 | 46                      |
| 19  | MET + SUL                  | MET + SUL + GLP-1     | 6.6                  | 11.7 | 33                      |
| 20  | MET + SUL                  | MET + INS             | 8.2                  | 11.5 | 17                      |
| 21  | MET + SUL                  | SUL                   | 5.8                  | 7.9  | 15                      |
| 22  | MET + INS                  | MET + INS             | 5.5                  | 16.1 | 1,594                   |
| 23  | MET + INS                  | MET + INS + GLP-1     | 6.7                  | 11.7 | 41                      |
| 24  | MET + INS                  | MET + INS + SUL       | 7.3                  | 12.5 | 31                      |
| 25  | SUL                        | SUL                   | 5.5                  | 12.5 | 1,228                   |
| 26  | SUL                        | SUL + MET             | 5.5                  | 11.5 | 99                      |
| 27  | SUL                        | No medication         | 5.6                  | 8.2  | 28                      |
| 28  | SUL                        | SUL + INS             | 7.5                  | 11.3 | 16                      |
| 29  | MET + INS + SUL            | MET + INS + SUL       | 5.5                  | 16.0 | 645                     |
| 30  | MET + INS + SUL            | MET + INS             | 6.3                  | 8.6  | 17                      |
| 31  | INS                        | INS                   | 5.5                  | 14.0 | 580                     |
| 32  | INS                        | INS + MET             | 5.8                  | 11.3 | 43                      |
| 33  | MET + DPP-4 + SUL          | MET + DPP-4 + SUL     | 5.5                  | 12.5 | 480                     |
| 34  | MET + DPP-4 + SUL          | MET + SUL             | 5.9                  | 8.6  | 29                      |
| 35  | MET + DPP-4                | MET + DPP-4           | 5.5                  | 11.3 | 376                     |
| 36  | MET + DPP-4                | MET + DPP-4 + SUL     | 6.6                  | 9.7  | 24                      |
| 37  | MET + DPP-4                | MET                   | 5.8                  | 8.1  | 13                      |
| 38  | MET + SUL + TZD            | MET + SUL + TZD       | 5.5                  | 12.2 | 324                     |
| 39  | MET + TZD                  | MET + TZD             | 5.5                  | 9.1  | 157                     |
| 40  | INS + SUL                  | INS + SUL             | 5.5                  | 12.4 | 178                     |
| 41  | MET + DPP-4 + INS          | MET + DPP-4 + INS     | 5.5                  | 11.9 | 158                     |
| 42  | MET + GLP-1                | MET + GLP-1           | 5.5                  | 9.0  | 122                     |

(Continued)

**Supplementary Table S3** (Continued)

| No. | Originally prescribed drug | Newly prescribed drug     | Valid range of HbA1c |      | Number of total records |
|-----|----------------------------|---------------------------|----------------------|------|-------------------------|
|     |                            |                           | Min                  | Max  |                         |
| 43  | MET + GLP-1 + INS          | MET + GLP-1 + INS         | 5.5                  | 14.3 | 132                     |
| 44  | MET + GLP-1 + SUL          | MET + GLP-1 + SUL         | 5.5                  | 9.7  | 101                     |
| 45  | TZD                        | TZD                       | 5.5                  | 8.3  | 91                      |
| 46  | SUL + TZD                  | SUL + TZD                 | 5.5                  | 9.2  | 110                     |
| 47  | DPP-4                      | DPP-4                     | 5.5                  | 8.1  | 83                      |
| 48  | DPP-4 + SUL                | DPP-4 + SUL               | 5.5                  | 9.1  | 81                      |
| 49  | MET + INS + TZD            | MET + INS + TZD           | 5.7                  | 9.5  | 52                      |
| 50  | MET + SGLT2 + SUL          | MET + SGLT2 + SUL         | 6.0                  | 9.1  | 48                      |
| 51  | MET + SGLT2                | MET + SGLT2               | 5.5                  | 8.4  | 40                      |
| 52  | MET + DPP-4 + SUL + TZD    | MET + DPP-4 + SUL + TZD   | 5.9                  | 8.7  | 34                      |
| 53  | MET + INS + SGLT2          | MET + INS + SGLT2         | 5.8                  | 8.6  | 35                      |
| 54  | GLP-1 + SUL                | GLP-1 + SUL               | 5.6                  | 8.9  | 31                      |
| 55  | GLP-1                      | GLP-1                     | 5.5                  | 7.8  | 30                      |
| 56  | MET + GLP-1 + INS + SGLT2  | MET + GLP-1 + INS + SGLT2 | 5.6                  | 8.7  | 31                      |
| 57  | MET + DPP-4 + INS + SUL    | MET + DPP-4 + INS + SUL   | 6.1                  | 8.7  | 22                      |
| 58  | DPP-4 + INS                | DPP-4 + INS               | 6.1                  | 8.3  | 14                      |
| 59  | GLP-1 + INS                | GLP-1 + INS               | 6.0                  | 8.0  | 12                      |
| 60  | MET + DPP-4 + TZD          | MET + DPP-4 + TZD         | 5.9                  | 8.3  | 19                      |
| 61  | MET + INS + SUL + TZD      | MET + INS + SUL + TZD     | 6.2                  | 8.2  | 14                      |

Abbreviations: DPP-4, dipeptidyl peptidase-4; GLP-1, glucagon-like peptide-1; INS, insulin; MET, metformin; SGLT2, sodium-glucose co-transporter-2; SUL, sulfonylurea; TZD, thiazolidinediones.
